# Supplementary material for: Secondary (iso)BAs cooperate with endogenous ligands to activate FXR under physiological and pathological conditions
Source: PubMed Central journal article supplement (PMC8177068; doi:10.1016/j.bbadis.2021.166153), 2021-04-22
Supplement: NIHMS1706919-supplement-Supplementary_Material.pdf [file NIHMS1706919-supplement-Supplementary_Material.pdf]

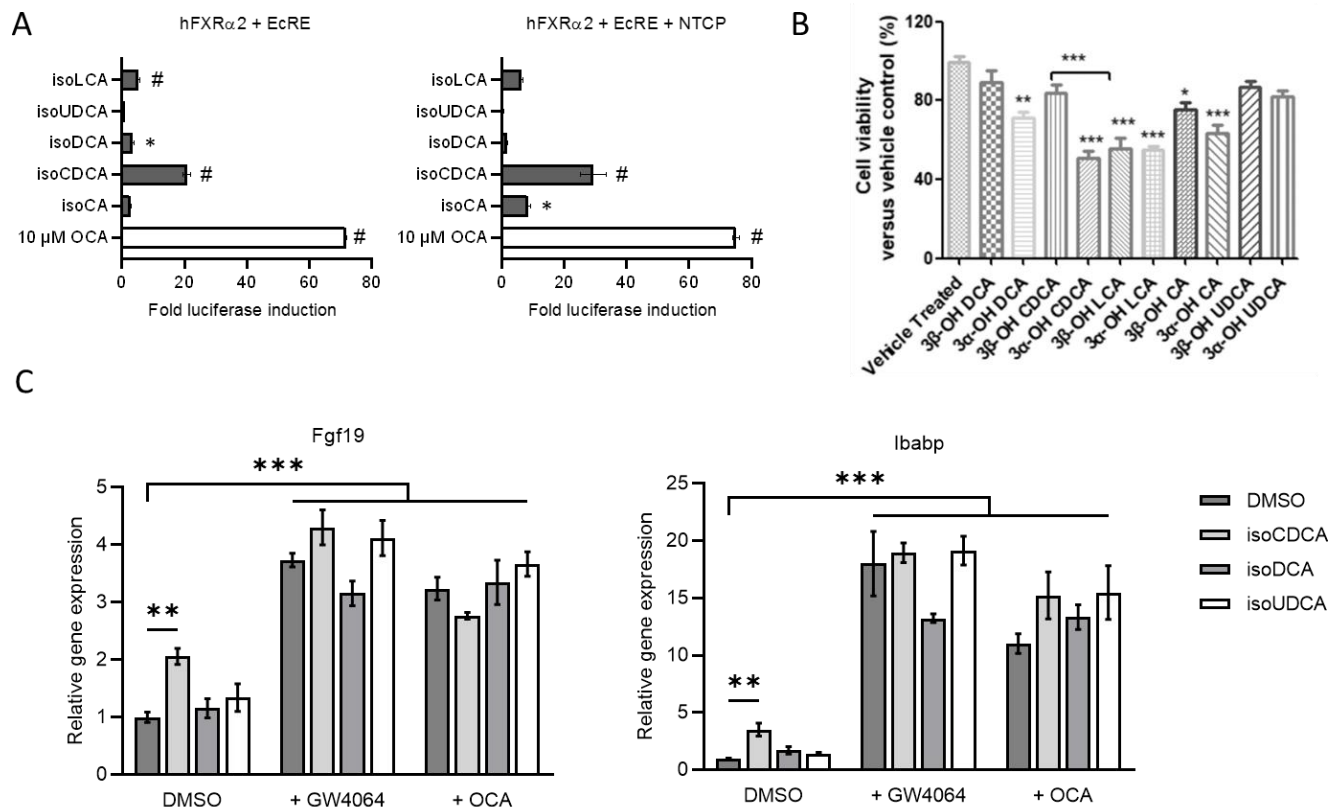

**Supplementary Figure 1.** (A) Cell-based hFXR $\alpha$ 2 luciferase assay co-transfected with or without NTCP; cells were exposed to vehicle (DMSO) or 100 $\mu$ M iso-bile acids (isoBAs). After 24 h of treatment, cells were lysed for determination of luciferase and  $\beta$ -galactosidase activities as described under “Materials and Methods”. (B) Toxicity of isoBAs and corresponding stereoisomers. Caco-2 cells were treated with 100  $\mu$ M bile acids for 24 h. The cytotoxicity-assay was normalized to vehicle (1% DMSO). Values are expressed as mean  $\pm$  SEM of three triplicate experiments, \* p < 0.05, \*\* p < 0.01, \*\*\* p < 0.001. (C) mRNA expression levels of FXR target genes (*Fgf19*, *Ibabp*) in human colon cancer cells after treatment with 100  $\mu$ M isoBAs in the presence or absence of FXR agonists (2  $\mu$ M GW4064, 10  $\mu$ M OCA); n=3. Values represent the mean  $\pm$  SEM. \*\*p < 0.01, \*\*\*p < 0.001.

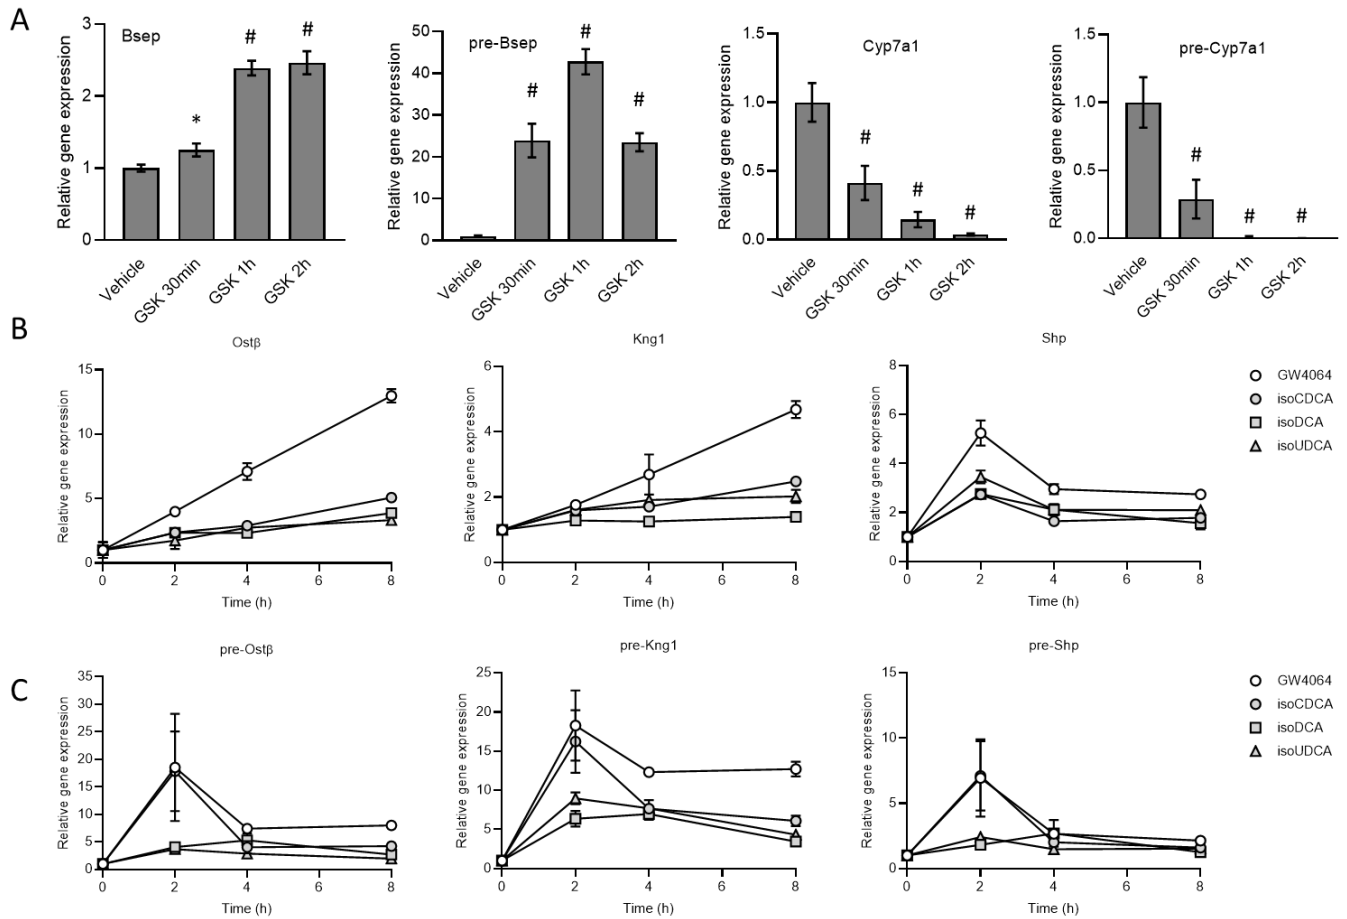

**Supplementary Figure 2.** (A) Hepatic expression of bile acid transport (*Bsep*) and BA-synthesis gene (*Cyp7a1*) pre-mRNA and mRNA after treatment with either vehicle or the synthetic FXR agonist GSK2324 for 30 minutes ( $n = 7-8$ ), 1 hour ( $n = 8$ ), or 2 hours ( $n = 7-8$ ) before sacrifice; values represent the mean  $\pm$  SEM. \* $p < 0.05$ , # $p < 0.01$ . Effect of the synthetic FXR ligand (GW4064) and isoBAs (isoCDCA, isoDCA, isoUDCA) on mRNA (B) and pre-mRNA (C) levels of *Ostb*, *Kng1*, *Shp* in HepG2 cells treated over time;  $n=3$ . Values represent the mean  $\pm$  SEM.

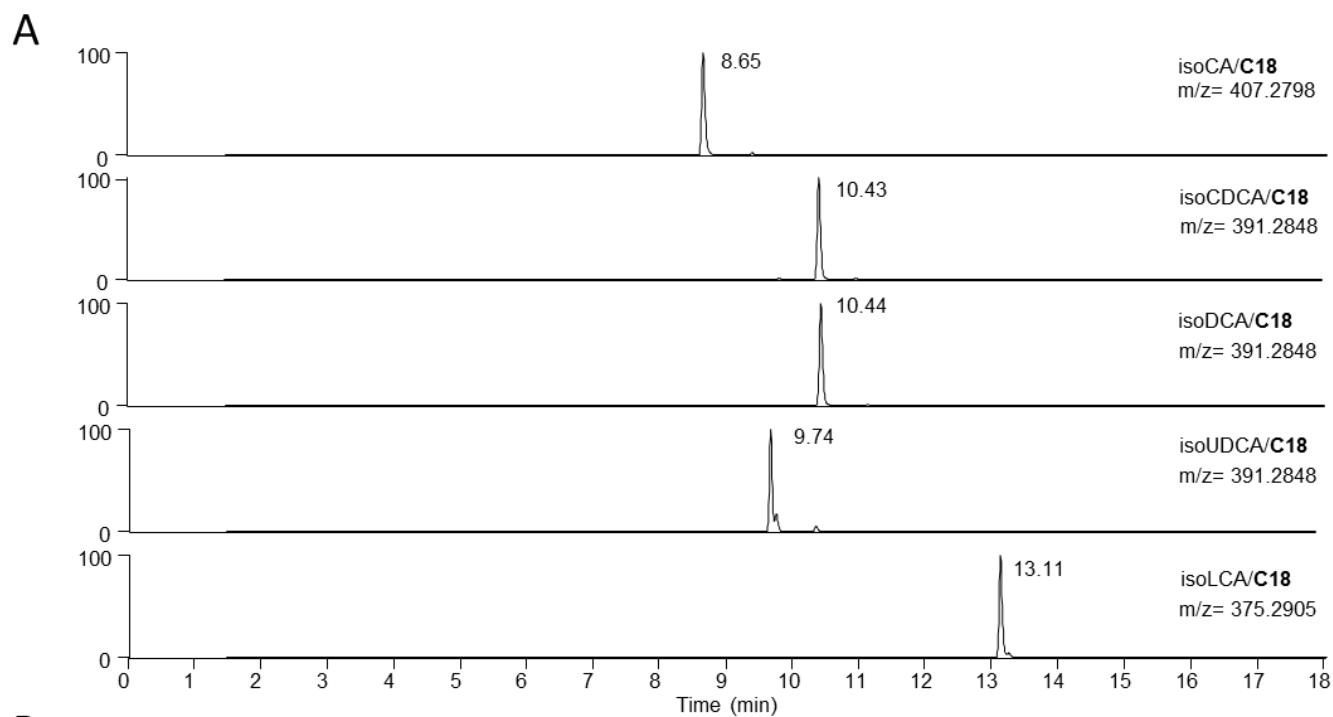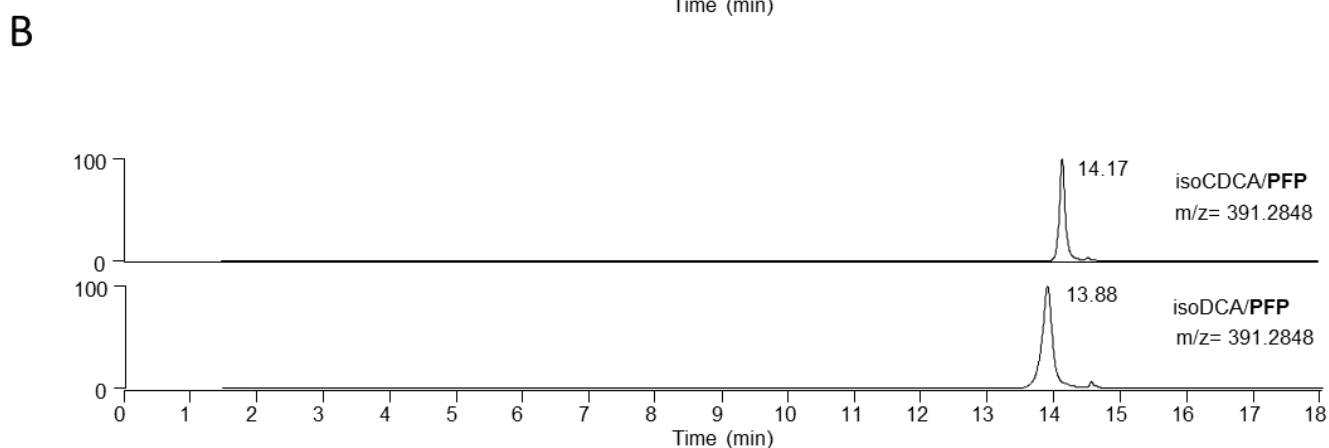

**Supplementary Figure 3.** Liquid chromatography–mass spectrometry (LC-MS) of synthesized isoBAs on (A) C-18 and (B) Pentafluorophenyl propyl (PFP) columns. 3b, 7a-dihydroxy and 3b, 12a-dihydroxy (isoCDCA and isoDCA) have identical retention times on the C18 column. LC/MS chromatography using PFP column allows separation of isoCDCA and isoDCA. (m/z) mass divided by charge number.

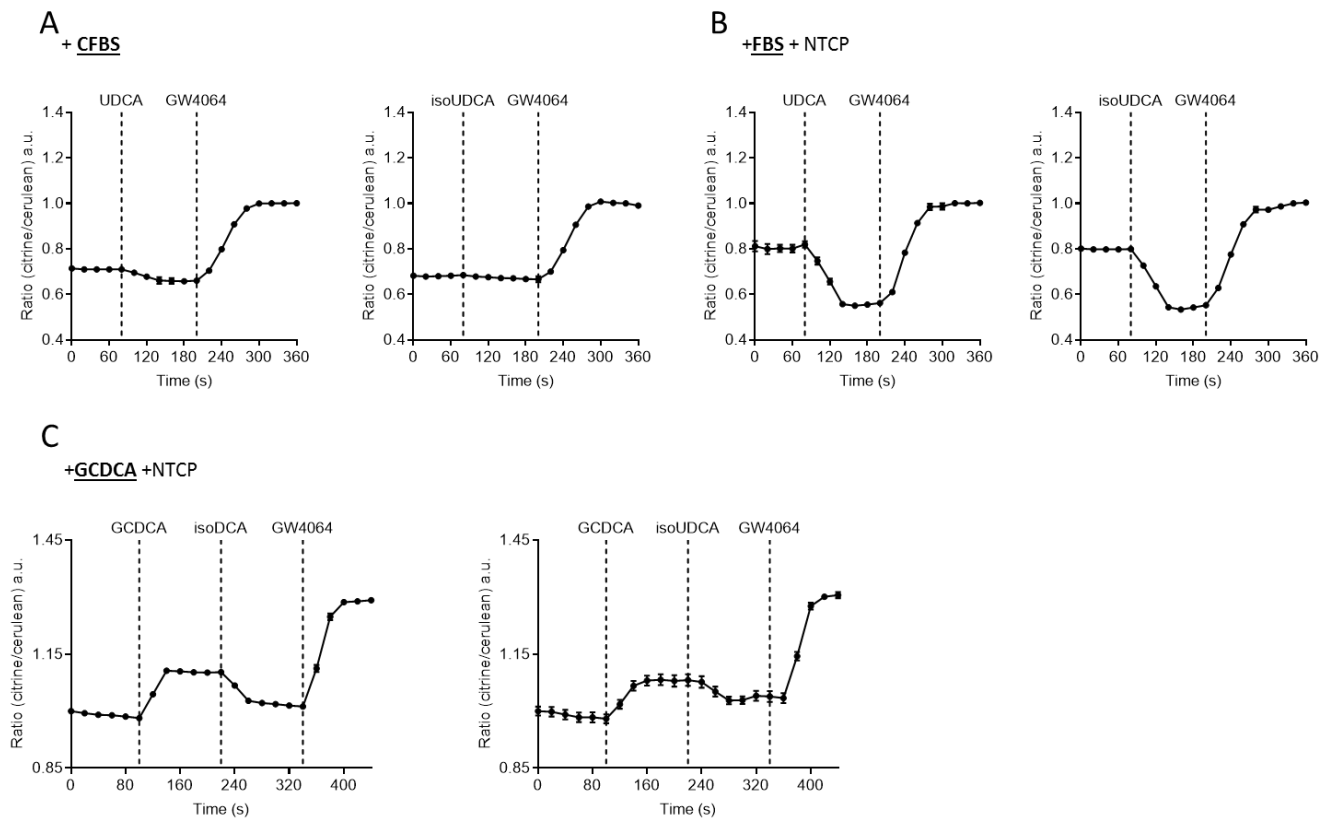

**Supplementary Figure 4.** Changes in FRET emission ratio upon addition of (A) 100 $\mu$ M UDCA or isoUDCA in **CFBS** and (B) 100 $\mu$ M UDCA or isoUDCA in **FBS** in nucleoBAS-NTCP-mKate2 expressing cells and 5 $\mu$ M GW4064 at t=200s. (C) FRET emission ratios in nucleoBAS-NTCP-mKate2 expressing U2OS cells treated with glycine conjugated CDCA (GCDCA) in DMEM containing charcoal treated serum (CFBS). 10 $\mu$ M GCDCA, 100 $\mu$ M isoUDCA or isoUDCA and 5 $\mu$ M GW4064 were added at time points indicated. n=6 cells per experiment; Error bars represent the SEM.

A

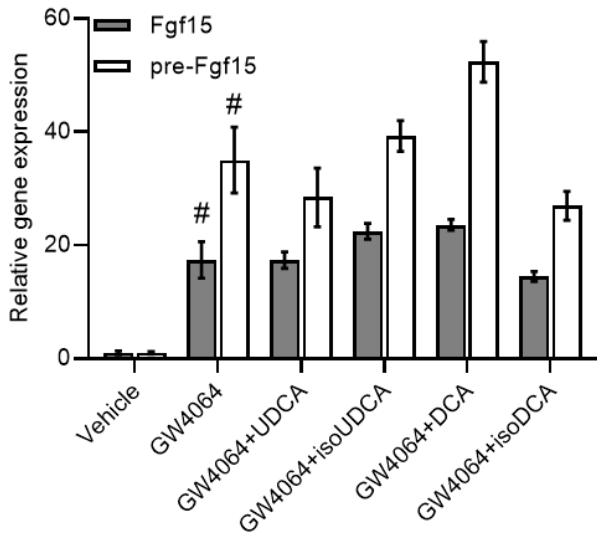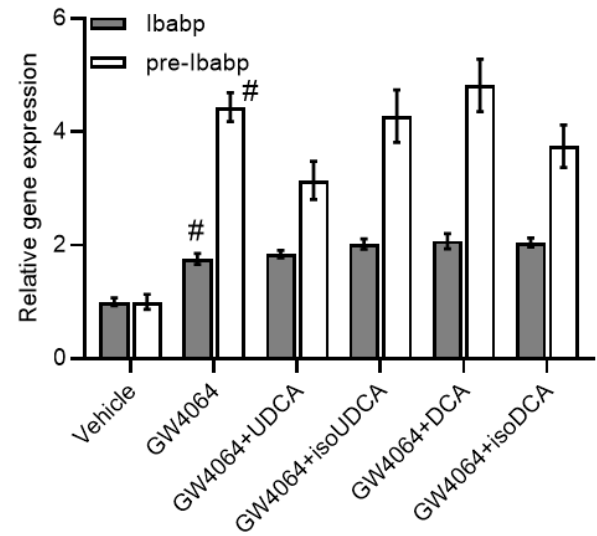

B

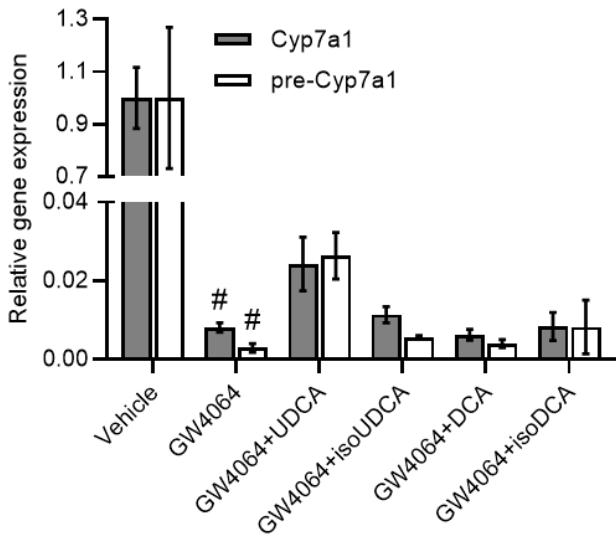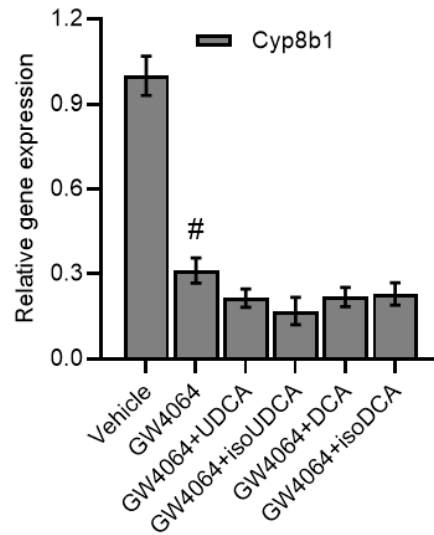

**Supplementary Figure 5.** Regulation of FXR target genes *in vivo* by single dose administration of secondary 3 $\alpha$ -hydroxy BAs or isoBAs in combination with GW4064. Supplement to Figure 5. (A) Regulation of Fgf15 and Ibabp pre-mRNA and mRNA by GW4064, UDCA+GW4064, isoUDCA+GW4064, DCA+GW4064 and isoDCA+GW4064. (B) Repression of bile acids synthesis genes (Cyp7a1 and Cyp8b1) in livers of mice treated with 3 $\alpha$ -hydroxy BAs or isoBAs and GW4064. Administration of BAs followed by GW4064 with 1h time-delay for a total of 6h. Mice were gavaged with olive oil (vehicle), GW4064 (30mg/kg BW), and BAs (60mg/kg BW). Genes were analyzed 6 hours after gavage; n=3-4, values represent the mean  $\pm$  SEM. \*p<0.05; #p<0.01.

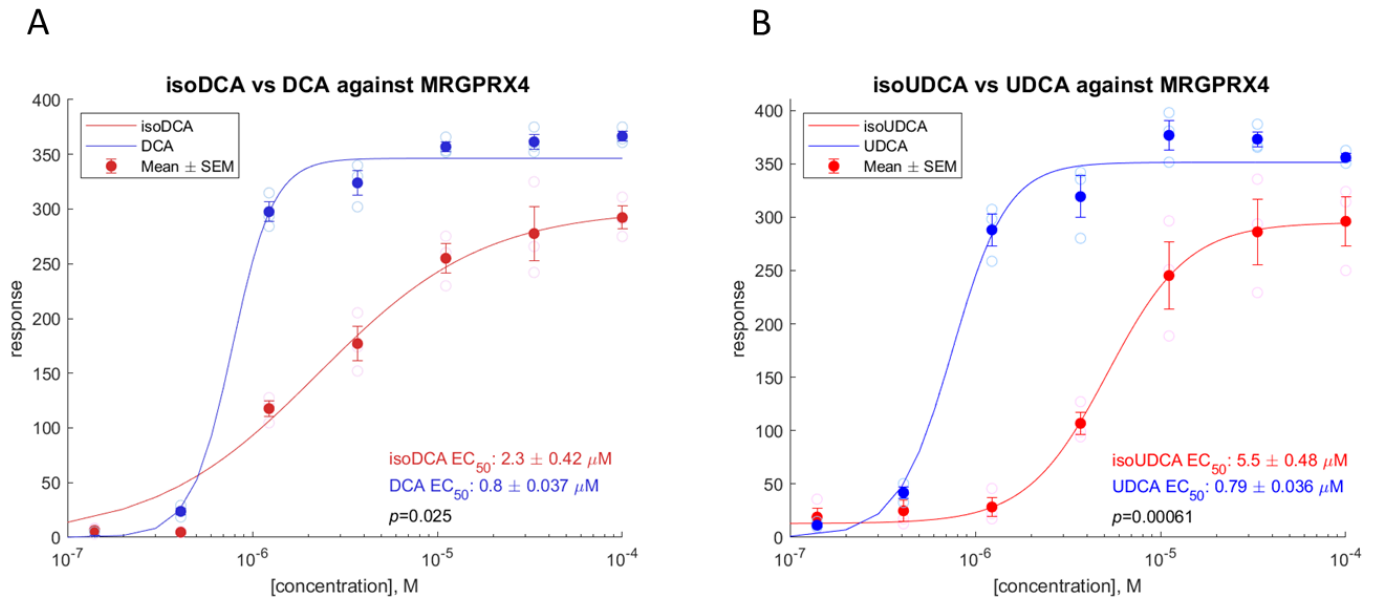

**Supplementary Figure 6.** Activation of MRGPRX4 by secondary isoBAs and 3alpha-epimers. Dose dependent  $\text{Ca}^{2+}$  response curves to different BAs in MRGPRX4-expressing HEK293 cells; (A) isoDCA and DCA, (B) isoUDCA and UDCA. Data are a representative experiment of three independent experiments performed in triplicate; values represent the mean  $\pm$  SEM.

## IsoBA synthesis and BA-standards used in this study

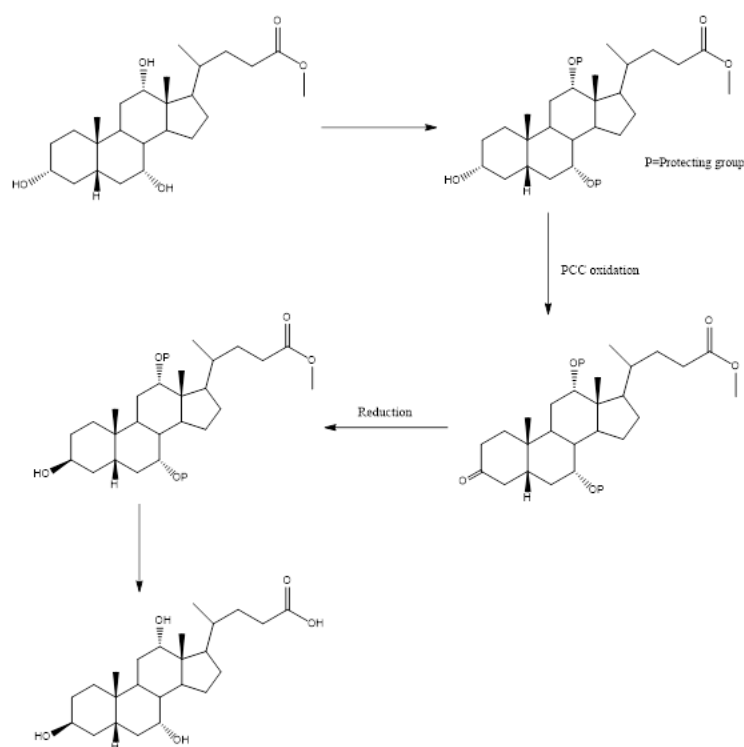

**Scheme 1 (Cholic acid is taken as a typical example to show the general strategic approach)**

All chemicals used were purchased from Sigma-Aldrich (Dublin, Ireland), excepted where stated. All chemical reactions were monitored by TLC. Uncorrected melting points were measured using a Stuart SMP11 melting point apparatus and were uncorrected. IR spectra were acquired on a Perkin Elmer 205 FT infrared Paragon 1000 spectrometer, with wavenumber given in unit  $\text{cm}^{-1}$ . Solid samples were presented using KBr disk and oils were measured as neat films on NaCl plates.  $^1\text{H}$  and  $^{13}\text{C}$  nuclear magnetic resonance (NMR) spectra were measured at the temperature of  $27^\circ\text{C}$  on a Bruker DPX 400 and an Agilent 40MR DD2 spectrometer (400.13MHz,  $^1\text{H}$ ; 100.61MHz,  $^{13}\text{C}$ ) using tetramethylsilane (TMS) as internal standard, in  $\text{CDCl}_3$ . Coupling constants were measured in Hz. For  $^1\text{H}$ -NMR, chemical shifts were reported: shift value (number of protons, multiplicity of the peak, coupling constants where applicable). Electrospray ionization mass spectrometry (ESI-MS) was performed in the positive ion mode on a liquid chromatography time-of-flight mass spectrometer (Micromass LCT, waters Ltd., Manchester, UK). Compound purity/accuracy was confirmed using a combination of  $^1\text{H}$ -NMR,  $^{13}\text{C}$ -NMR, TLC and HR-MS.

## General procedure for the formation of 3 $\beta$ -OH bile acids with L-selectride solution

To a cooled solution of the 24-methyl ester protected bile acid 3-ketone (0.90 g, 2.015 mmol) in dry THF (15 ml) was dropwise added a solution of L-selectride (1.8 ml, 4 eq.) under N<sub>2</sub> condition and the mixture was stirred at -18°C for over one hour and then allowed to warm to RT and stirred for overnight. TLC analysis showed formation of two closely separated products (mobile phase hexane: EtOAc=1:1). The mixture was quenched with a saturated ammonium chloride solution (100 ml) and then extracted with DCM (3×50 ml). The combined organic layer was washed with brine (100 ml) and was dried over MgSO<sub>4</sub> and filtered. The solvent was removed in vacuum and then purified by flash column chromatography (hexane: EtOAc=1:1) to yield majority of beta product (0.82 g, 90.35%) and a small amount of alpha hydroxy compound (0.09 g, 9.65%).

### 3 $\beta$ -hydroxy-12 $\alpha$ -hydroxy-5 $\beta$ -cholanoate (3 $\beta$ -OH DCA)

<sup>1</sup>H-NMR  $\delta$  (CDCl<sub>3</sub>): 0.67 (3H, s, 18-CH<sub>3</sub>), 0.93 (3H, s, 19-CH<sub>3</sub>), 0.95 (3H, d, J = 6.2 Hz, 21-CH<sub>3</sub>), 1.04-1.16 (4H, m, 8-CH, 9-CH, 14-CH, 17-CH), 1.23-1.33 (3H, m, 1-CH<sub>2</sub>, 20-CH), 1.35-1.60 (10H, m, 2-CH<sub>2</sub>, 4-CH<sub>2</sub>, 6-CH<sub>2</sub>, 7-CH<sub>2</sub>, 11-CH<sub>2</sub>), 1.61-1.76 (4H, m, 15-CH<sub>2</sub>, 16-CH<sub>2</sub>), 1.77-1.85 (2H, m, 22-CH<sub>2</sub>), 2.22-2.38 (2H, m, 23-CH<sub>2</sub>), 3.98 (1H, s, 12 $\beta$ -H), 4.09 (1H, s, 3 $\alpha$ -H). <sup>13</sup>C-NMR ppm (CDCl<sub>3</sub>): 12.7 (18-C, CH<sub>3</sub>), 17.3 (19-C, CH<sub>3</sub>), 23.6 (21-C, CH<sub>3</sub>), 25.9 (15-C, CH<sub>2</sub>), 26.5 (16-C, CH<sub>2</sub>), 27.4 (6-C, CH<sub>2</sub>), 28.9 (11-C, CH<sub>2</sub>), 30.7 (2-C, CH<sub>2</sub>), 30.8 (22-C, CH<sub>2</sub>), 32.8 (23-C, CH<sub>2</sub>), 32.9 (7-C, CH<sub>2</sub>), 35.0 (20-C, CH), 35.8 (1-C, CH<sub>2</sub>), 35.9 (8-C, 9-C, CH), 36.3 (4-C, CH<sub>2</sub>), 36.4 (5C-CH), 46.5 (13-C, C-CH<sub>3</sub>), 47.3(17-C, CH), 48.3 (14-C, CH), 67.2 (3-C, CH), 73.3 (12-C, CH), 179.3 (24-C, COOH). HRMS: Found: (M+H)<sup>+</sup> = 392.2852, calculated C<sub>24</sub>H<sub>39</sub>O<sub>4</sub><sup>+</sup>=392.2854.

### 3 $\beta$ -hydroxy-7 $\alpha$ -hydroxy-5 $\beta$ -cholanoate (3 $\beta$ -OH CDCA)

<sup>1</sup>H-NMR  $\delta$  (CDCl<sub>3</sub>): 0.64 (3H, s, 18-CH<sub>3</sub>), 0.93 (6H, m, 19-CH<sub>3</sub>, 21-CH<sub>3</sub>), 1.04-1.15 (4H, m, 8-CH, 9-CH, 14-CH, 17-CH), 1.21-1.32 (3H, m, 1-CH<sub>2</sub>, 20-CH), 1.36-1.60 (10H, m, 2-CH<sub>2</sub>, 4-CH<sub>2</sub>, 6-CH<sub>2</sub>, 7-CH<sub>2</sub>, 11-CH<sub>2</sub>), 1.61-1.74 (4H, m, 15-CH<sub>2</sub>, 16-CH<sub>2</sub>), 1.75-1.86 (2H, m, 22-CH<sub>2</sub>), 2.20-2.43 (2H, m, 23-CH<sub>2</sub>), 3.85 (1H, d, 7 $\beta$ -H), 4.06 (1H, s, 3 $\alpha$ -H). <sup>13</sup>C-NMR ppm (CDCl<sub>3</sub>): 11.8 (18-C, CH<sub>3</sub>), 18.3 (19-C, CH<sub>3</sub>), 21.0 (21-C, CH<sub>3</sub>), 21.6 (11-C, CH<sub>2</sub>), 23.2 (15-C, CH<sub>2</sub>), 28.0 (16-C, CH<sub>2</sub>), 29.8 (2-C, CH<sub>2</sub>), 30.8 (22-C, CH<sub>2</sub>), 31.1 (23-C, CH<sub>2</sub>), 35.7 (1-C, CH<sub>2</sub>), 35.8 (20-C, CH), 36.0 (10-C, C-CH<sub>3</sub>), 37.3 (4-C, CH<sub>2</sub>), 39.0 (6-C, CH) 39.3 (8-C, CH), 39.7 (12-C, CH<sub>2</sub>), 41.9 (5-C, CH), 42.8 (13-C, C-CH<sub>3</sub>), 50.5 (14-C, CH), 55.7 (17-C, CH), 68.8 (7-C, CH), 71.7 (3-C, CH), 178.6 (24-C, COOH). HRMS: Found: (M+H)<sup>+</sup> = 392.2847, calculated C<sub>24</sub>H<sub>39</sub>O<sub>4</sub><sup>+</sup>=392.2854.



### **3 $\beta$ -hydroxy-5 $\beta$ -cholanoate (3 $\beta$ -OH LCA)**

$^1\text{H-NMR}$   $\delta$  ( $\text{CDCl}_3$ ): 0.63 (3H, s, 18- $\text{CH}_3$ ), 0.90 (3H, d,  $J = 6.1$  Hz, 21- $\text{CH}_3$ ), 0.94 (3H, s, 19- $\text{CH}_3$ ), 1.00-1.16 (4H, m, 8-CH, 9-CH, 14-CH, 17-CH), 1.24-1.32 (3H, m, 1- $\text{CH}_2$ , 20-CH), 1.38-1.56 (10H, m, 2- $\text{CH}_2$ , 4- $\text{CH}_2$ , 6- $\text{CH}_2$ , 7- $\text{CH}_2$ , 11- $\text{CH}_2$ ), 1.67-1.78 (4H, m, 15- $\text{CH}_2$ , 16- $\text{CH}_2$ ), 1.80-1.88 (2H, m, 22- $\text{CH}_2$ ), 2.22-2.40 (2H, m, 23- $\text{CH}_2$ ), 4.09 (1H, s, 3 $\alpha$ -H).  $^{13}\text{C-NMR}$  ppm ( $\text{CDCl}_3$ ): 12.1 (18-C,  $\text{CH}_3$ ), 18.2 (19-C,  $\text{CH}_3$ ), 21.1 (21-C,  $\text{CH}_3$ ), 24.2 (11-C,  $\text{CH}_2$ ), 26.5 (15-C,  $\text{CH}_2$ ), 27.4 (16-C,  $\text{CH}_2$ ), 28.2 (6-C,  $\text{CH}_2$ ), 30.7 (2-C,  $\text{CH}_2$ ), 30.8 (22-C,  $\text{CH}_2$ ), 32.8 (7-C,  $\text{CH}_2$ ), 32.8 (23-C,  $\text{CH}_2$ ), 32.9 (7-C,  $\text{CH}_2$ ), 34.6 (20-C, CH), 35.1 (10-C,  $\underline{\text{C}}\text{-CH}_3$ ), 35.8 (1-C,  $\text{CH}_2$ ), 35.9 (8-C, CH), 36.5 (4-C,  $\text{CH}_2$ ), 46.5 (5-C, CH), 47.3 (12-C,  $\text{CH}_2$ ), 48.3 ( $\underline{\text{C}}\text{-CH}_3$ ), 55.0 (9-C, CH), 55.9 (17-C, CH), 56.7 (14-C, CH), 67.2 (3-C, CH), 179.3 (24-C, COOH). HRMS: Found:  $(\text{M}+\text{H})^+ = 376.2902$ , calculated  $\text{C}_{24}\text{H}_{39}\text{O}_3^+ = 376.2905$ .

### **3 $\beta$ -hydroxy-7 $\alpha$ -hydroxy-12 $\alpha$ -hydroxyl-5 $\beta$ -cholanoate (3 $\beta$ -OH CA)**

$^1\text{H-NMR}$   $\delta$  ( $\text{CDCl}_3$ ): 0.69 (3H, s, 18- $\text{CH}_3$ ), 0.93 (3H, s, 19- $\text{CH}_3$ ), 0.98 (3H, d,  $J = 6.2$  Hz, 21- $\text{CH}_3$ ), 1.13-1.24 (4H, m, 8-CH, 9-CH, 14-CH, 17-CH), 1.24-1.40 (3H, m, 1- $\text{CH}_2$ , 20-CH), 1.40-1.56 (10H, m, 2- $\text{CH}_2$ , 4- $\text{CH}_2$ , 6- $\text{CH}_2$ , 7- $\text{CH}_2$ , 11- $\text{CH}_2$ ), 1.72-1.77 (4H, m, 15- $\text{CH}_2$ , 16- $\text{CH}_2$ ), 1.80-1.88 (2H, m, 22- $\text{CH}_2$ ), 2.37-2.47 (2H, m, 23- $\text{CH}_2$ ), 3.85 (1H, d, 7 $\beta$ -H), 3.98 (1H, s, 12 $\beta$ -H), 4.06 (1H, s, 3 $\alpha$ -H).  $^{13}\text{C-NMR}$  ppm ( $\text{CDCl}_3$ ): 12.1 (18- $\text{CH}_3$ ), 14.2 (19- $\text{CH}_3$ ), 18.4 (21- $\text{CH}_3$ ), 21.0 (15-C,  $\text{CH}_2$ ), 23.5 (16-C,  $\text{CH}_2$ ), 26.9 (9-C, CH), 28.6 (11-C,  $\text{CH}_2$ ), 30.8 (2-C,  $\text{CH}_2$ ), 30.9 (22-C, CH), 34.1 (23-C,  $\text{CH}_2$ ), 34.2 (1-C,  $\text{CH}_2$ ), 35.2 (20-C, CH), 37.2 (4-C & 6-C,  $\text{CH}_2$ ), 39.4 (10-C,  $\underline{\text{C}}\text{-CH}_3$ ), 40.2 (8-C, CH), 43.8 (5-C,  $\underline{\text{C}}\text{-CH}_3$ ), 49.8 (14-C, CH), 55.0 (17-C, CH), 68.8 (7-C, CH), 71.4 (3-C, CH), 73.3 (12-C, CH), 179.2 (24-C, COOH). HRMS: Found:  $(\text{M}+\text{H})^+ = 408.2802$ , calculated  $\text{C}_{24}\text{H}_{39}\text{O}_5^+ = 408.2803$ .

### **3 $\beta$ -hydroxy-7 $\beta$ -hydroxy-5 $\beta$ -cholanoate (3 $\beta$ -OH UDCA)**

$^1\text{H-NMR}$   $\delta$  ( $\text{CDCl}_3$ ): 0.67 (3H, s, 18- $\text{CH}_3$ ), 0.93 (3H, d,  $J = 6.1$  Hz, 21- $\text{CH}_3$ ), 0.97 (3H, s, 19- $\text{CH}_3$ ), 1.04-1.20 (4H, m, 8-CH, 9-CH, 14-CH, 17-CH), 1.24-1.43 (3H, m, 1- $\text{CH}_2$ , 20-CH), 1.43-1.52 (10H, m, 2- $\text{CH}_2$ , 4- $\text{CH}_2$ , 6- $\text{CH}_2$ , 7- $\text{CH}_2$ , 11- $\text{CH}_2$ ), 1.74-1.78 (4H, m, 15- $\text{CH}_2$ , 16- $\text{CH}_2$ ), 1.82-1.83 (2H, m, 22- $\text{CH}_2$ ), 2.35-2.39 (2H, m, 23- $\text{CH}_2$ ), 3.54 (1H, m, 7 $\alpha$ -H), 4.06 (1H, s, 3 $\alpha$ -H).  $^{13}\text{C-NMR}$  ppm ( $\text{CDCl}_3$ ): 12.2 (19-C,  $\text{CH}_3$ ), 18.4 (18-C,  $\text{CH}_3$ ), 21.5 (21-C,  $\text{CH}_3$ ), 23.9 (11-C,  $\text{CH}_2$ ), 26.9 (5-C,  $\text{CH}_2$ ), 28.6 (6-C,  $\text{CH}_2$ ), 30.6 (2-C,  $\text{CH}_2$ ), 30.9 (22-C,  $\text{CH}_2$ ), 34.5 (23-C,  $\text{CH}_2$ ), 35.1 (20-C, CH), 35.2 (10-C,  $\text{CH}_2$ ), 36.9 (1-C,  $\text{CH}_2$ ), 37.2 (4-C & 6-C,  $\text{CH}_2$ ), 38.6 (8-C, CH), 40.1 (5-C, CH), 40.2 (9-C, CH), 43.6 (12-C,  $\text{CH}_2$ ), 43.8 (13-C,  $\underline{\text{C}}\text{-CH}_3$ ), 55.0 (14-C, CH), 55.9 (17-C, CH), 66.7 (7-C, CH), 71.5 (3-C, CH), 177.8 (24-C, COOH). HRMS: Found:  $(\text{M}+\text{H})^+ = 392.2848$ , calculated  $\text{C}_{24}\text{H}_{39}\text{O}_4^+ = 392.2854$ .

## 1. Bile acids and keto/oxo intermediates used as standards for LC/MS/MS.

| Common Name                                                                                                                                                                               | Abbreviation     | Name                                                                         | CAS No.:       | Mass (-1) |
|-------------------------------------------------------------------------------------------------------------------------------------------------------------------------------------------|------------------|------------------------------------------------------------------------------|----------------|-----------|
| 7-Keto deoxycholic acid                                                                                                                                                                   | 7KDC             | 3 $\alpha$ ,12 $\alpha$ -dihydroxy-7-oxo-5 $\beta$ -cholanic acid            | CAS 911-40-0   | 405,2641  |
| 7-Keto lithocholic acid                                                                                                                                                                   | 7KL              | 3- $\alpha$ -Hydroxy-7-oxo-5- $\beta$ -cholan-24-oic acid                    | CAS 4651-67-6  | 389,2692  |
| 3-oxo deoxycholic acid                                                                                                                                                                    | 3oxoDC           | 5- $\beta$ -CHOLANIC ACID-12-ALPHA-DIOL-3-ONE                                | CAS 07-01-4185 | 389,2692  |
| (3 $\beta$ ) Iso-deoxycholic acid                                                                                                                                                         | <b>IDC</b>       | 5 $\beta$ -CHOLANIC ACID-3 $\beta$ , 12 $\alpha$ -DIOL                       | CAS 570-63-8   | 391,2848  |
| 3-keto deoxycholic acid = 3-DEHYDROCHOLIC ACID                                                                                                                                            | 3KDC             | 5- $\beta$ -CHOLANIC ACID-7- $\alpha$ 12- $\alpha$ -DIOL-3-ONE               | CAS 2304-89-4  | 405,2641  |
| Ursocholic acid = 7-Epicholic acid                                                                                                                                                        | UC               | 3 $\alpha$ ,7 $\beta$ ,12 $\alpha$ -Trihydroxy-5 $\beta$ -cholan-24-oic acid | CAS 2955-27-3  | 407,2797  |
| 12 $\beta$ -hydroxy isocholic acid = ligo deoxycholic acid                                                                                                                                | 12 $\beta$ IC    | 5 $\beta$ -CHOLANIC ACID-3 $\alpha$ , 7 $\alpha$ , 12 $\beta$ -TRIOL         | CAS 71883-64-2 | 407,2797  |
| 12-Ketolithocholic acid = 12-Ketodeoxycholic acid                                                                                                                                         | 12KL             | 5- $\beta$ -CHOLANIC ACID-3- $\alpha$ -OL-12-ONE                             | CAS 5130-29-0  | 389,2692  |
| <i>Iso-deoxycholic acid</i>                                                                                                                                                               | <b>IDC/wrong</b> | 5 $\beta$ -CHOLANIC ACID-7 $\alpha$ , 12 $\alpha$ -DIOL                      | CAS 566-17-6   | 391,2848  |
| <a href="https://www.steraloids.com/5cholanic-acid-1/chol-based/5-cholanic-acid-7-12-diol.html">https://www.steraloids.com/5cholanic-acid-1/chol-based/5-cholanic-acid-7-12-diol.html</a> |                  |                                                                              |                |           |
|                                                                                                                                                                                           |                  |                                                                              |                |           |
| <b>isoBAs synthesized and used in this study</b>                                                                                                                                          |                  |                                                                              |                |           |
| (3 $\beta$ ) Iso-chenodeoxycholic acid                                                                                                                                                    | isoCDCA          | 5 $\beta$ -CHOLANIC ACID-3 $\beta$ , 7 $\alpha$ -DIOL                        |                | 391,2848  |
| (3 $\beta$ ) Iso-cholic acid                                                                                                                                                              | isoCA            | 5 $\beta$ -CHOLANIC ACID-3 $\beta$ , 7 $\alpha$ , 12 $\alpha$ -TRIOL         |                | 407,2797  |
| (3 $\beta$ ) Iso-deoxycholic acid                                                                                                                                                         | isoDCA           | 5 $\beta$ -CHOLANIC ACID-3 $\beta$ , 12 $\alpha$ -DIOL                       |                | 391,2848  |
| (3 $\beta$ ) Iso-ursodeoxycholic acid                                                                                                                                                     | isoUDCA          | 5 $\beta$ -CHOLANIC ACID-3 $\beta$ , 7 $\beta$ -DIOL                         |                | 391,2848  |
| (3 $\beta$ ) Iso-lithocholic acid                                                                                                                                                         | isoLCA           | 5 $\beta$ -CHOLANIC ACID-3 $\beta$ -OL                                       |                | 391,2848  |
|                                                                                                                                                                                           |                  |                                                                              |                |           |
| <b>Conjugated and unconjugated primary and secondary BAs were purchased from:</b>                                                                                                         | TRC -canada      | Steraloids Inc.                                                              | Sigma          |           |
